# Supplementary material for: Biomaterials Based on Carbon Nanotube Nanocomposites of Poly(styrene-b-isobutylene-b-styrene): The Effect of Nanotube Content on the Mechanical Properties, Biocompatibility and Hemocompatibility
Source: MDPI journal article supplement (doi:10.3390/nano12050733), 2022-02-22
Supplement: s1 [file s1]

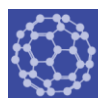

## Supplementary Material

# Biomaterials Based on Carbon Nanotube Nanocomposites of Poly(styrene-*b*-isobutylene-*b*-styrene): The Effect of Nanotube Content on the Mechanical Properties, Biocompatibility and Hemocompatibility

Maria A. Rezvova <sup>1,\*</sup>, Pavel A. Nikishau <sup>2</sup>, Miraslau I. Makarevich <sup>2,3</sup>, Tatiana V. Glushkova <sup>1</sup>, Kirill Yu. Klyshnikov <sup>1</sup>, Tatiana N. Akentieva <sup>1</sup>, Olga S. Efimova <sup>4</sup>, Andrey P. Nikitin <sup>4</sup>, Valentina Yu. Malysheva <sup>4</sup>, Vera G. Matveeva <sup>1</sup>, Evgeniia A. Senokosova <sup>1</sup>, Mariam Yu. Khanova <sup>1</sup>, Viacheslav V. Danilov <sup>5</sup>, Dmitry M. Russakov <sup>6</sup>, Zinifer R. Ismagilov <sup>4</sup>, Sergei V. Kostjuk <sup>2,3,7</sup> and Evgeny A. Ovcharenko <sup>1</sup>

<sup>1</sup> Department of experimental medicine, Research Institute for Complex Issues of Cardiovascular Diseases, 650002 Kemerovo, Russia;

bio.tvg@mail.ru (T.V.G.); klyshnikovk@gmail.com (K.Y.K.); t.akentieva@mail.ru (T.N.A.); matveeva\_vg@mail.ru (V.G.M.); sergeewa.ew@yandex.ru (E.A.S.); khanovam@gmail.com (M.Y.K.); ov.eugene@gmail.com (E.A.O.)

<sup>2</sup> Research Institute for Physical Chemical Problems, Belarusian State University, 220006 Minsk, Belarus; nikishau@bsu.by (P.A.N.); miraslau.makarevich@gmail.com (M.I.M.); kostjuks@bsu.by (S.V.K.)

<sup>3</sup> Department of Chemistry, Belarusian State University, 220006 Minsk, Belarus

<sup>4</sup> Institute of coal chemistry and material science, Federal Research Center of Coal and Coal Chemistry SB RAS, 650000 Kemerovo, Russia; efimovaos@mail.ru (O.S.E.); nikitinandrey@yandex.ru (A.P.N.); v23091@yandex.ru (V.Y.M.); zinifer1@mail.ru (Z.R.I.)

<sup>5</sup> Research Laboratory for Processing and Analysis of Big Data, Tomsk Polytechnic University, 634050 Tomsk, Russia; viacheslav.v.danilov@gmail.com

<sup>6</sup> Institute of fundamental Sciences, Kemerovo State University, 650000 Kemerovo, Russia; dm.russakov@gmail.com

<sup>7</sup> Institute for regenerative medicine, Sechenov First Moscow State Medical University, 119991 Moscow, Russia

\* Correspondence: rezvovama@gmail.com

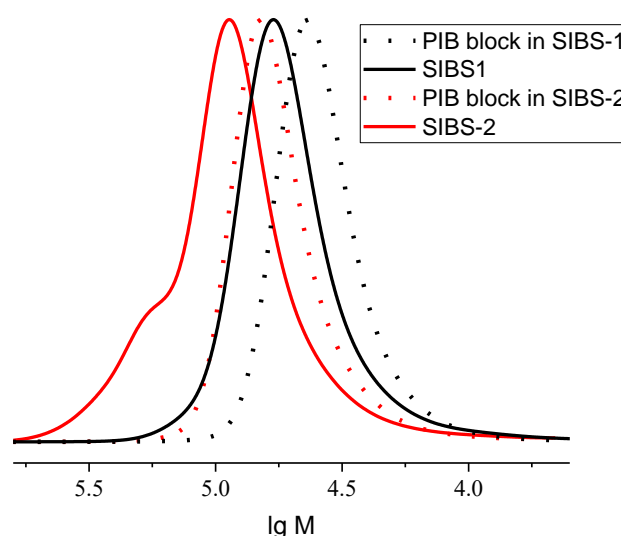

**Figure S1.** SEC traces of polyisobutylenes and tri-block copolymers. See Table 1 for the details on the properties of SIBS-1 and SIBS-2.

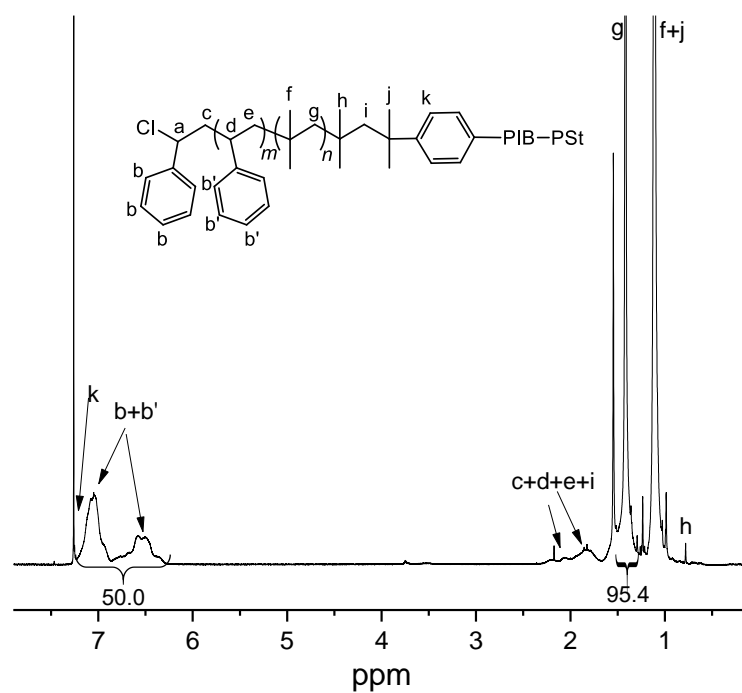

**Figure S2.**  $^1\text{H}$  NMR spectra of the SIBS-2. Signal a was not detected due to high molecular weight of triblock copolymer sample.

$$\omega_{\text{St}} = \frac{I_{b+b'} \times 104/5}{I_{b+b'} \times 104/5 + I_g \times 56.1/2} \times 100\% \quad (\text{S1})$$

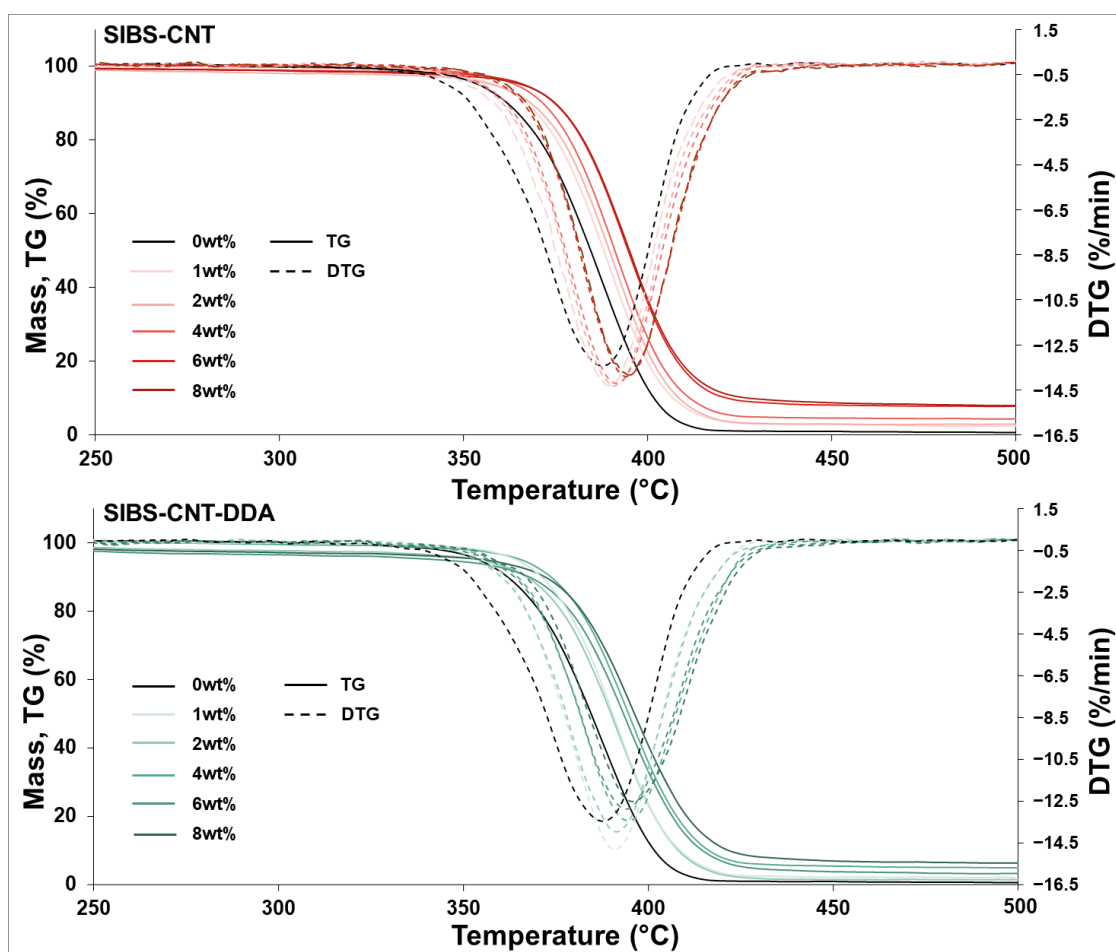

Figure S3. TG and DTG curves of nanocomposite films.

Table S1. The results of determining the particle size of CNT dispersions in chloroform by the DLS method.

| Sample   | Particle size, nm |
|----------|-------------------|
| CNT      | $0.96 \pm 0.15$   |
|          | $11.70 \pm 1.02$  |
|          | $34.03 \pm 5.13$  |
|          | $141.3 \pm 29.48$ |
|          | $654.5 \pm 130.1$ |
| CNT-COOH | $1.50 \pm 0.15$   |
|          | $11.70 \pm 2.03$  |
|          | $68.06 \pm 13.03$ |
|          | $342.0 \pm 71.91$ |
| CNT-DDA  | $1.29 \pm 0.19$   |
|          | $18.17 \pm 0.99$  |
|          | $55.48 \pm 8.90$  |
|          | $115.9 \pm 21.85$ |
|          | $499.4 \pm 93.73$ |

**Table S2.** Decomposition parameters of composite films and pure polymer.

| Sample          | T <sub>onset</sub> (°C) | T <sub>max</sub> (°C) | T <sub>end</sub> (°C) | Residual weight, % |
|-----------------|-------------------------|-----------------------|-----------------------|--------------------|
| SIBS            | 365.9                   | 387.6                 | 402.8                 | 0.24               |
| SIBS-CNT-1%     | 370.8                   | 389.6                 | 404.7                 | 1.77               |
| SIBS-CNT-2%     | 372.9                   | 389.7                 | 406.2                 | 2.14               |
| SIBS-CNT-4%     | 374.1                   | 391.2                 | 406.6                 | 3.39               |
| SIBS-CNT-6%     | 377.2                   | 394.5                 | 409.8                 | 7.06               |
| SIBS-CNT-8%     | 377.5                   | 395.2                 | 410.0                 | 7.22               |
| SIBS-CNT-DDA-1% | 373.6                   | 390.9                 | 406.2                 | 2.23               |
| SIBS-CNT-DDA-2% | 373.1                   | 391.2                 | 407.7                 | 1.50               |
| SIBS-CNT-DDA-4% | 376.7                   | 395.0                 | 410.8                 | 3.84               |
| SIBS-CNT-DDA-6% | 375.8                   | 393.9                 | 410.9                 | 3.34               |
| SIBS-CNT-DDA-8% | 377.7                   | 395.7                 | 413.3                 | 6.35               |
